# Supplementary material for: SGP-C: A Broad Host Range Temperate Bacteriophage; Against Salmonella gallinarum
Source: PubMed Central journal article supplement (PMC8790156; doi:10.3389/fmicb.2021.768931), 2022-01-12
Supplement: Data_Sheet_1.pdf [file Data_Sheet_1.pdf]

### **SGP-C Infection dynamics**

MV50 is the MOI at which 50% of the bacterial population is cleared by phage.

**Local Virulence (Vi):** Local virulence can be calculated by using the following formula:

$$V_i = 1 - (A_i/A_o)$$

$V_i$  can be measured at the scale of 0 to 1, where 0 indicates the complete absence and 1 represents the maximum theoretical virulence.

Here  $A_i$  is the area under curve at specific MOI of SGP-C, while  $A_o$  is the area under the curve for phage free bacterial control SG-C.

At MOI 0.01 the local virulence can be calculated as follows:

$$V_{0.01} = 1 - (1.081/2.162) \\ = 0.50$$

Then using the values of local virulence at different MOI virulence curve were generated between MOI (x-axis) and respective local virulence (y-axis).

Virulence curve used for calculating virulence index by using following formula:

$$V_p = A_p/A_{max}$$

For calculating  $V_p$ , MOI were converted to  $\log_{10}$  (MOI) and were plotted against the local virulence (Fig 8). From curve ( $A_p$ ) was calculated by using trapezoid method.  $A_p$  is the area covered by SGP-C phage in experiment while  $A_{max}$  is the area for maximum theoretical virulence.

$$V_{iB-SGP-C} = A_{SGP-C} / A_{max} \\ = 3.053/6$$

=0.508

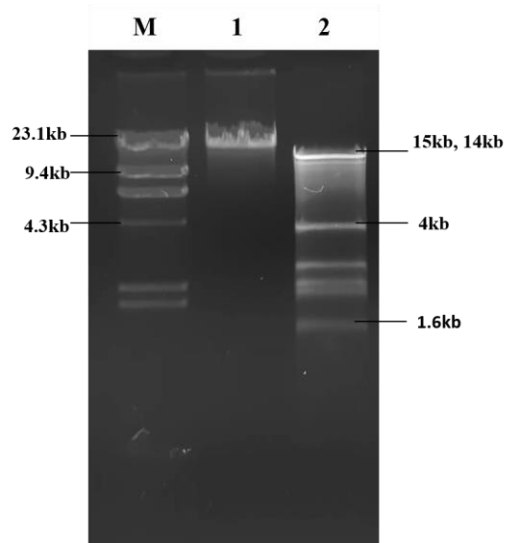

*Figure S1:* SGP-C phage genome restriction digestion with HindIII enzyme. Lane M contains Phage Lambda DNA ladder, Lane 1 with uncut SGP-C DNA and Lane 2 restricted with Hind3 enzyme.

Table S1: Primer pair for Tail Length Tape Measure Protein (2310bp) of SGP-C phage.

| <b>Primer</b> | <b>Sequence</b>      | <b>Tm</b> | <b>Primer Binding site</b> | <b>Product size</b> |
|---------------|----------------------|-----------|----------------------------|---------------------|
| FP-TLTP       | CGTTGGCGTCAATATGCTGG | 60.0      | 709bp                      | 852bp               |
| RP-TLTP       | TCTGAGCGACATACGCATCC | 60.0      | 1560bp                     |                     |

Table S2: SGP-C phage Efficiency of Plating (EOP)

| <b>Bacterial Host</b> | <b>SGP-C titer with SG strains</b> | <b>EOP</b> |
|-----------------------|------------------------------------|------------|
| SG-C (original host)  | 1.1x 10 <sup>10</sup>              | 1.00       |
| Sg-4                  | 3.3x 10 <sup>9</sup>               | 0.3        |
| Sg-A                  | 4.5x 10 <sup>9</sup>               | 0.41       |
| Sg-B                  | 4.5x 10 <sup>9</sup>               | 0.41       |
| Sg-D                  | 5.0x 10 <sup>9</sup>               | 0.45       |
| Sg-E                  | 4.0x 10 <sup>9</sup>               | 0.36       |
| Sg-F                  | 6.0x 10 <sup>9</sup>               | 0.55       |
| Sg-G                  | 5.0x 10 <sup>9</sup>               | 0.45       |
| Sg-18                 | 6.0x 10 <sup>9</sup>               | 0.55       |
| Sg-12                 | 5.0x 10 <sup>9</sup>               | 0.45       |
| Sg-36                 | 6.7x 10 <sup>9</sup>               | 0.61       |
| Sg-47                 | 6.0x 10 <sup>9</sup>               | 0.55       |
| Sg-67                 | 5.0x 10 <sup>9</sup>               | 0.45       |
| Sg-60                 | 6.0x 10 <sup>9</sup>               | 0.55       |
| Sg-29                 | 4.5x 10 <sup>9</sup>               | 0.45       |

Table S3: The comprehensive characterization of SGP-C genome and characteristics of the annotated proteins. Putative proteins with known function are highlighted

| Gene # | Location on genome |      | Total bp | CDS | Total GC content | Function                                 | Protein family                                         | Total aa | Similar protein         | Similarity index | Accession no.  | Mol. Wt (kDa) | TMH | Isoelectric point (pH) |
|--------|--------------------|------|----------|-----|------------------|------------------------------------------|--------------------------------------------------------|----------|-------------------------|------------------|----------------|---------------|-----|------------------------|
|        | Start              | stop |          |     |                  |                                          |                                                        |          |                         |                  |                |               |     |                        |
| 1.     | 607                | 2    | 606      | -   | 51               | Putative tail fiber protein              | Bacteriophage lambda tail assembly protein I           | 202      | Salmonella phage SETP3  | 99.50%           | YP_001110802.1 | 22.0          | 0   | 5.02                   |
| 2.     | 861                | 598  | 264      | -   | 52               | Hypothetical protein                     | DUF1460 ; Protein of unknown function (DUF1460)        | 87       | Salmonella phage SETP13 | 100%             | YP_008767029.1 | 9.8           | 0   | 6.34                   |
| 3.     | 1475               | 960  | 516      | -   | 50               | Tail protein                             | Phage_tail_L ; Phage minor tail protein L              | 171      | Salmonella phage SE2    | 98.83%           | YP_005098154.1 | 19.2          | 0   | 4.20                   |
| 4.     | 1972               | 1472 | 501      | -   | 51               | Tail protein                             | Phage_min_tail ; Phage minor tail protein              | 166      | Salmonella phage SS3e   | 99.40%           | YP_308655.1    | 18.7          | 0   | 4.67                   |
| 5.     | 4283               | 1974 | 2310     | -   | 52               | Tail length tape measure-related protein | TMP_2 ; Prophage tail length tape measure protein      | 769      | Salmonella phage pink   | 98.57            | OIN98000.1     | 81.6          | 0   | 4.97                   |
| 6.     | 4611               | 4276 | 336      | -   | 46               | Hypothetical protein                     | DUF1799 ; Phage related hypothetical protein (DUF1799) | 111      | Salmonella phage SETP3  | 95.50%           | YP_001110852.1 | 12.6          | 0   | 5.24                   |
| 7.     | 5003               | 4638 | 366      | -   | 51               | Tail assembly chaperone                  | Phage_TAC_4 ; Phage tail assembly chaperone            | 121      | Salmonella phage SETP3  | 97.52%           | YP_001110851.1 | 13.7          | 0   | 4.76                   |
| 8.     | 5232               | 5561 | 330      | +   | 44               | Hypothetical protein                     |                                                        | 109      | Salmonella phage STP03  | 89.91%           | APM00265.1     | 11.6          | 0   | 4.97                   |
| 9.     | 5624               | 6760 | 1137     | +   | 50               | Hypothetical protein                     |                                                        | 378      | Salmonella phage SETP13 | 92.33%           | YP_008767022.1 | 42.6          | 0   | 9.29                   |

|     |       |       |      |   |    |                       |                                                                   |     |                                  |        |                                |      |   |       |
|-----|-------|-------|------|---|----|-----------------------|-------------------------------------------------------------------|-----|----------------------------------|--------|--------------------------------|------|---|-------|
| 10. | 6757  | 6987  | 231  | + | 43 | Hypothetical protein  | DUF3310 ; Protein of unknwon function (DUF3310)                   | 76  | Salmonella phage STP03           | 97.37  | <a href="#">APM00267.1</a>     | 8.9  | 0 | 5.08  |
| 11. | 8185  | 7016  | 1170 | - | 51 | Putative tail protein | Phage_tube_2 ; Phage tail tube protein                            | 389 | Salmonella phage pink            | 97.43% | <a href="#">QIN97994.1</a>     | 41.1 | 0 | 4.29  |
| 12. | 8604  | 8185  | 420  | - | 47 | Hypothetical protein  | DUF4128 ; Bacteriophage related domain of unknown function        | 139 | Salmonella phage Jersey          | 94.96% | <a href="#">YP_008239729.1</a> | 15.1 | 0 | 4.23  |
| 13. | 8999  | 8604  | 396  | - | 46 | Putative tail protein | HK97-gp10_like ; Bacteriophage HK97-gp10, putative tail-component | 131 | Salmonella phage SETP13          | 100%   | <a href="#">YP_008767017.1</a> | 14.5 | 0 | 10.48 |
| 14. | 9355  | 8996  | 360  | - | 49 | Hypothetical protein  | Phage_attach ; Phage Head-Tail Attachment                         | 119 | Salmonella phage SETP13          | 98.32% | <a href="#">YP_008767016.1</a> | 13.1 | 0 | 10.13 |
| 15. | 9960  | 9355  | 606  | - | 53 | Putative neck protein |                                                                   | 201 | Salmonella phage SETP7           | 95.52% | <a href="#">YP_008767187.1</a> | 20.6 | 0 | 9.58  |
| 16. | 10472 | 9963  | 510  | - | 51 | Hypothetical protein  | DUF3199 ; Protein of unknown function (DUF3199)                   | 169 | Salmonella phage vB_SpuS_Sp4     | 97.63% | <a href="#">AWY03048.1</a>     | 17.8 | 0 | 4.45  |
| 17. | 10664 | 10476 | 189  | - | 50 | Hypothetical protein  |                                                                   | 62  | Salmonella phage FSL SP-101      | 98.39% | <a href="#">YP_009617930.1</a> | 7.1  | 0 | 4.61  |
| 18. | 11051 | 10701 | 351  | - | 48 | Neck whiskers protein |                                                                   | 116 | Salmonella phage S101            | 98.28% | <a href="#">AXC39560.1</a>     | 12.2 | 0 | 4.46  |
| 19. | 11347 | 11063 | 285  | - | 55 | Head protein          | Phage_head_fibr ; Head fiber protein                              | 94  | Salmonella phage vB_SenS_PVP-SE2 | 97.87% | <a href="#">AST15498.1</a>     | 9.3  | 0 | 10.48 |

|     |       |       |      |   |    |                                        |                                                                             |     |                                       |        |                                |      |   |       |
|-----|-------|-------|------|---|----|----------------------------------------|-----------------------------------------------------------------------------|-----|---------------------------------------|--------|--------------------------------|------|---|-------|
| 20. |       |       | 1050 |   | 54 |                                        | Gp13-like ;<br>Major capsid<br>protein 13-like                              | 349 | Salmonella<br>phage FSL SP-<br>101    | 99.14% | <a href="#">YP_009617927.1</a> | 37.8 | 0 | 4.37  |
|     | 12457 | 11408 |      | - |    | Coat protein                           |                                                                             |     |                                       |        |                                |      |   |       |
| 21. |       |       | 702  |   | 50 |                                        | Putative<br>Scaffold protein                                                | 233 | Salmonella<br>phage SETP3             | 99.14% | <a href="#">YP_001110836.1</a> | 25.7 | 0 | 6.18  |
|     | 13162 | 12461 |      | - |    |                                        |                                                                             |     |                                       |        |                                |      |   |       |
| 22. |       |       | 378  |   | 53 |                                        | Putative spanin<br>protein                                                  | 128 | Salmonella<br>phage SETP7             | 96.03% | <a href="#">YP_008767179.1</a> | 14.2 | 0 | 8.43  |
|     | 13742 | 13356 |      | - |    |                                        |                                                                             |     |                                       |        |                                |      |   |       |
| 23. | 13851 | 14009 | 159  | + | 47 |                                        | hypothetical<br>protein                                                     | 52  |                                       |        |                                | 6.0  | 0 | 9.94  |
| 24. |       |       | 459  |   | 49 |                                        | Tail protein                                                                | 152 | Salmonella<br>phage wks13             | 97.37% | <a href="#">YP_009608684.1</a> | 16.4 | 0 | 4.41  |
|     | 14519 | 14061 |      | - |    |                                        |                                                                             |     |                                       |        |                                |      |   |       |
| 25. |       |       | 1860 |   | 52 |                                        | Head<br>morphogenesis<br>protein                                            | 619 | Salmonella<br>phage demigod           | 97.09% | <a href="#">OIN98040.1</a>     | 67.4 | 0 | 4.99  |
|     | 16381 | 14522 |      | - |    |                                        | Phage_min_cap2<br>; Phage minor<br>capsid protein 2                         |     |                                       |        |                                |      |   |       |
| 26. | 16484 | 16852 | 369  | + | 45 |                                        | Hypothetical<br>protein                                                     | 122 | Salmonella<br>phage SETP13            | 100%   | <a href="#">YP_008767003.1</a> | 14.2 | 0 | 4.34  |
| 27. |       |       | 1470 |   | 54 |                                        | Phage_prot_Gp6<br>; Phage portal<br>protein, SPP1<br>Gp6-like               | 489 | Salmonella<br>phage pink              | 98.57% | <a href="#">OIN97976.1</a>     | 53.9 | 0 | 4.48  |
|     | 18357 | 16888 |      | - |    | Portal protein                         |                                                                             |     |                                       |        |                                |      |   |       |
| 28. |       |       | 1272 |   | 51 |                                        | Terminase_1 ;<br>Phage<br>Terminase                                         | 423 | Salmonella<br>phage STP03             | 99.53% | <a href="#">APM00285.1</a>     | 47.6 | 0 | 6.30  |
|     | 19641 | 18370 |      | - |    | Terminase,<br>large subunit            |                                                                             |     |                                       |        |                                |      |   |       |
| 29. |       |       | 507  |   | 54 |                                        | Phage_term_sma<br>; Putative<br>bacteriophage<br>terminase small<br>subunit | 168 | Salmonella<br>phage vB_SenS-<br>EnJE1 | 100%   | <a href="#">OGJ84413.1</a>     | 18.9 | 0 | 6.29  |
|     | 20137 | 19631 |      | - |    | Putative<br>terminase small<br>subunit |                                                                             |     |                                       |        |                                |      |   |       |
| 30. | 20501 | 20271 | 231  | - | 44 |                                        | Hypothetical<br>protein                                                     | 76  | Salmonella<br>phage Ent1              | 97.37% | <a href="#">YP_007010511.1</a> | 8.2  | 0 | 6.23  |
| 31. | 20812 | 20513 | 300  | - | 45 |                                        | Hypothetical<br>protein                                                     | 99  | Salmonella<br>phage Ent1              | 98.99% | <a href="#">YP_007010510.1</a> | 11.7 | 1 | 10.25 |
| 32. | 21165 | 20809 | 357  | - | 49 |                                        | DUF2774 ;<br>Protein of<br>unknown<br>function<br>(DUF2774)                 | 118 | Salmonella<br>phage SETP13            | 99.15% | <a href="#">YP_008767066.1</a> | 13.6 | 0 | 8.24  |
|     |       |       |      |   |    | Hypothetical<br>protein                |                                                                             |     |                                       |        |                                |      |   |       |
| 33. | 21317 | 21162 | 156  | - | 50 |                                        | DUF2737 ;<br>Protein of<br>unknown                                          | 51  | Salmonella<br>phage LSPA1             | 92.16% | <a href="#">YP_009113202.1</a> | 6.0  | 0 | 11.43 |
|     |       |       |      |   |    | Hypothetical<br>protein                |                                                                             |     |                                       |        |                                |      |   |       |

|     |                       |                       |                     |   |                    |                           |                                                 |                     |                                                 |                        |                                |                      |                   |                       |
|-----|-----------------------|-----------------------|---------------------|---|--------------------|---------------------------|-------------------------------------------------|---------------------|-------------------------------------------------|------------------------|--------------------------------|----------------------|-------------------|-----------------------|
|     |                       |                       |                     |   |                    |                           | function (DUF2737)                              |                     |                                                 |                        |                                |                      |                   |                       |
| 34. | 21511                 | 21314                 | 198                 | - | 42                 | Hypothetical protein      | DUF6501 ; Family of unknown function (DUF6501)  | 65                  | Escherichia phage vB_EcoS_XY1                   | 84.62%                 | <a href="#">QIG59228.1</a>     | 7.2                  | 0                 | 4.05                  |
| 35. | 21693                 | 21508                 | 186                 | - | 47                 | Hypothetical protein      |                                                 | 61                  | Salmonella phage SETP7                          | 95.08%                 | <a href="#">APM00294.1</a>     | 6.8                  | 0                 | 8.47                  |
| 36. | 21893                 | 21699                 | 195                 | - | 45                 | Hypothetical protein      |                                                 | 64                  | Salmonella phage SETP13                         | 96.88%                 | <a href="#">YP_008767062.1</a> | 7.0                  | 0                 | 4.52                  |
| 37. | <a href="#">22567</a> | <a href="#">22079</a> | <a href="#">489</a> | - | <a href="#">55</a> | <a href="#">Endolysin</a> | <a href="#">Phage_lysozyme ; Phage lysozyme</a> | <a href="#">162</a> | <a href="#">Salmonella phage vB_SenS_phi135</a> | <a href="#">97.53%</a> | <a href="#">AYP69682.1</a>     | <a href="#">17.3</a> | <a href="#">0</a> | <a href="#">10.35</a> |
| 38. | 22989                 | 22837                 | 153                 | - | 45                 | Hypothetical protein      | DUF6107 ; Family of unknown function (DUF6107)  | 50                  | Salmonella phage SF4                            | 100%                   | <a href="#">QDH44753.1</a>     | 5.7                  | 0                 | 4.59                  |
| 39. | 23632                 | 23198                 | 435                 | - | 48                 | Hypothetical protein      |                                                 | 144                 | Salmonella phage SE2                            | 97.92%                 | <a href="#">YP_005098116.1</a> | 15.5                 | 0                 | 4.36                  |
| 40. | 24003                 | 23638                 | 366                 | - | 52                 | Hypothetical protein      |                                                 | 121                 | Salmonella phage vB_SpuS_Sp4                    | 99.17%                 | <a href="#">AWY03010.1</a>     | 13.8                 | 0                 | 11.18                 |
| 41. | 24209                 | 24006                 | 204                 | - | 53                 | Hypothetical protein      |                                                 | 67                  | Salmonella phage Shelanagig                     | 100%                   | <a href="#">QEG07391.1</a>     | 7.5                  | 0                 | 7.42                  |
| 42. | 24445                 | 24206                 | 240                 | - | 54                 | Hypothetical protein      |                                                 | 79                  | Salmonella phage vB_SenS_phi135                 | 65.56%                 | <a href="#">AYP69680.1</a>     | 8.9                  | 0                 | 5.72                  |
| 43. | 24664                 | 24458                 | 207                 | - | 47                 | Hypothetical protein      |                                                 | 68                  | Salmonella phage SETP13                         | 95.16%                 | <a href="#">YP_008767053.1</a> | 8.1                  | 1                 | 10.44                 |
| 44. | 24846                 | 24661                 | 186                 | - | 48                 | Hypothetical protein      | DUF2680 ; Protein of unknown function (DUF2680) | 61                  | Salmonella phage skrot                          | 96.72%                 | <a href="#">QIO03728.1</a>     | 7.0                  | 0                 | 4.46                  |



|     |       |       |      |   |    |                                            |                                                             |     |                                 |        |                                |      |   |      |
|-----|-------|-------|------|---|----|--------------------------------------------|-------------------------------------------------------------|-----|---------------------------------|--------|--------------------------------|------|---|------|
| 45. |       |       | 204  |   | 46 | Hypothetical protein                       |                                                             | 67  | Salmonella phage vB_SenS_phi135 | 96.97% | <a href="#">AYP69705.1</a>     | 7.4  | 0 | 9.53 |
| 46. | 25310 | 25107 | 171  | - | 52 | Helix-turn-helix domain-containing protein | Phage_Cox ; Regulatory phage protein cox ; HTH_17           | 56  | Salmonella phage Shelanagig     | 100%   | <a href="#">QEG07385.1</a>     | 6.6  | 0 | 9.65 |
|     | 25948 | 26118 |      | + |    |                                            |                                                             |     |                                 |        |                                |      |   |      |
| 47. |       |       | 234  |   | 43 | Hypothetical protein                       | DUF4423 ; Domain of unknown function (DUF4423)              | 77  | Salmonella phage SETP7          | 100%   | <a href="#">YP_008767217.1</a> | 8.6  | 0 | 9.55 |
|     | 26115 | 26348 |      | + |    |                                            |                                                             |     |                                 |        |                                |      |   |      |
| 48. |       |       | 2187 |   | 54 | DNA primase/helicase                       | Rad51 ; Rad51                                               | 728 | Salmonella phage vB_StyS-sam    | 99.45% | <a href="#">BBO66012.1</a>     | 80.5 | 0 | 4.82 |
|     | 26405 | 28591 |      | + |    |                                            |                                                             |     |                                 |        |                                |      |   |      |
| 49. |       |       | 219  |   | 53 | Phage repressor Helix-turn-helix domain    | P22 -Cro;DNA-binding transcriptional regulator ; Cro        | 72  | Salmonella phage SETP13         | 97.18% | <a href="#">YP_008767044.1</a> | 78.9 | 0 | 9.51 |
|     | 28824 | 28606 |      | + |    |                                            |                                                             |     |                                 |        |                                |      |   |      |
| 50. |       |       | 537  |   | 45 | 13.88 kDa late protein                     | DUF4363 ; Domain of unknown function (DUF4363)              | 178 | Salmonella phage NBSal007       | 89.56% | <a href="#">QMP81625.1</a>     | 20.1 | 0 | 4.27 |
|     | 28959 | 29495 |      | + |    |                                            |                                                             |     |                                 |        |                                |      |   |      |
| 51. |       |       | 1431 |   | 50 | Hypothetical protein                       | DUF2800 ; Protein of unknown function (DUF2800), Rad52-like | 476 | Salmonella phage BPS11Q3        | 95.80% | <a href="#">YP_009322843.1</a> | 53.2 | 0 | 6.53 |
|     | 29537 | 30967 |      | + |    |                                            |                                                             |     |                                 |        |                                |      |   |      |
| 52. |       |       | 624  |   | 48 | Hypothetical protein                       | DUF2815 ; Protein of unknown function (DUF2815)             | 207 | Salmonella phage SETP7          | 100%   | <a href="#">YP_008767210.1</a> | 23.4 | 0 | 4.68 |
|     | 31049 | 31672 |      | + |    |                                            |                                                             |     |                                 |        |                                |      |   |      |
| 53. |       |       | 2304 |   | 51 | DNA polymerase I                           | DNA_pol_A ; DNA polymerase family A                         | 767 | Salmonella phage STP03          | 87.96% | <a href="#">APM00319.1</a>     | 86.8 | 0 | 7.87 |
|     | 31829 | 34132 |      | + |    |                                            |                                                             |     |                                 |        |                                |      |   |      |

|     |                       |                       |                      |                   |                    |                                           |                                                                 |                     |                                                  |                        |                                |                      |                   |                      |
|-----|-----------------------|-----------------------|----------------------|-------------------|--------------------|-------------------------------------------|-----------------------------------------------------------------|---------------------|--------------------------------------------------|------------------------|--------------------------------|----------------------|-------------------|----------------------|
| 54. | 34122                 | 34253                 | 132                  | +                 | 47                 | Hypothetical protein                      |                                                                 | 43                  | Salmonella phage BPS11Q3                         | 86.05%                 | <a href="#">YP_009322846.1</a> | 4.8                  | 0                 | 7.35                 |
| 55. | 34336                 | 34530                 | 195                  | +                 | 48                 | Hypothetical protein                      |                                                                 | 64                  | Salmonella phage FSL SP-101                      | 96.88%                 | <a href="#">YP_009617954.1</a> | 7.3                  | 0                 | 4.11                 |
| 56. | <a href="#">34527</a> | <a href="#">34811</a> | <a href="#">285</a>  | <a href="#">+</a> | <a href="#">50</a> | <a href="#">Restriction endonucleases</a> | <a href="#">VRR_NUC ; VRR-NUC domain</a>                        | <a href="#">94</a>  | <a href="#">Salmonella phage BPS11Q3</a>         | <a href="#">97.85%</a> | <a href="#">YP_009322848.1</a> | <a href="#">10.9</a> | <a href="#">0</a> | <a href="#">9.96</a> |
| 57. | 34843                 | 35034                 | 192                  | +                 | 48                 | Hypothetical protein                      |                                                                 | 63                  | Salmonella phage SETP7                           | 100%                   | <a href="#">YP_008767205.1</a> | 7.0                  | 0                 | 9.73                 |
| 58. | 35031                 | 35528                 | 498                  | +                 | 48                 | Hypothetical protein                      | HNH_3 ; HNH endonuclease                                        | 165                 | Salmonella phage vB_StyS-sam                     | 96.97%                 | <a href="#">BBO65957.1</a>     | 18.8                 | 0                 | 10.31                |
| 59. | <a href="#">35525</a> | <a href="#">37990</a> | <a href="#">2466</a> | <a href="#">+</a> | <a href="#">51</a> | <a href="#">Putative helicase</a>         | <a href="#">Hom_end_hint ; Hom_end-associated Hint</a>          | <a href="#">821</a> | <a href="#">Salmonella phage vB_SenS_PVP-SE2</a> | <a href="#">97.56%</a> | <a href="#">AST15461.1</a>     | <a href="#">92.5</a> | <a href="#">0</a> | <a href="#">8.80</a> |
| 60. | 37987                 | 38208                 | 222                  | +                 | 45                 | Hypothetical protein                      | DUF4140 ; N-terminal domain of unknown function (DUF4140)       | 73                  | Salmonella phage vB_SenS-Ent2                    | 100%                   | <a href="#">YP_009009957.1</a> | 8.7                  | 0                 | 4.56                 |
| 61. | 38205                 | 38297                 | 93                   | +                 | 43                 | Hypothetical protein                      | DUF6479 ; Family of unknown function (DUF6479)                  | 30                  | Salmonella phage SG2                             | 96.67%                 | <a href="#">ASZ76550.1</a>     | 3.1                  | 1                 | 9.27                 |
| 62. | <a href="#">40381</a> | <a href="#">38327</a> | <a href="#">2055</a> | <a href="#">-</a> | <a href="#">50</a> | <a href="#">Tailspike protein</a>         | <a href="#">PhageP22-tail ; Salmonella phage P22 tail-spike</a> | <a href="#">684</a> | <a href="#">Salmonella phage wast</a>            | <a href="#">98.93%</a> | <a href="#">QIN99606.1</a>     | <a href="#">72.9</a> | <a href="#">0</a> | <a href="#">4.93</a> |
| 63. | <a href="#">42361</a> | <a href="#">40394</a> | <a href="#">1968</a> | <a href="#">-</a> | <a href="#">49</a> | <a href="#">Tail fiber protein</a>        | <a href="#">Phage-tail_3 ; Putative phage tail protein</a>      | <a href="#">655</a> | <a href="#">Salmonella phage vB_SenS_PVP-SE2</a> | <a href="#">99.54%</a> | <a href="#">AST15460.1</a>     | <a href="#">72.4</a> | <a href="#">0</a> | <a href="#">5.21</a> |

Table S4: SGPC Promoter sequences and position on genome

| Sr.no | Strand | Positions      | Promoter Sequence                    | Type  | Scores |
|-------|--------|----------------|--------------------------------------|-------|--------|
| 1.    | +      | (11341..11366) | TTGACATTATATAGCCTCCGTATAAA           | host  | 0.983  |
| 2.    | +      | (13994..14023) | TTTACATTGGCAATGAATAATTGGAATAAT       | host  | 0.937  |
| 3.    | +      | (14907..14929) | AAATCAGCTTCACTAAAGACCAA              | phage | 0.804  |
| 4.    | +      | (16416..16445) | TAAAATATTTGTTGCTTAACCAAATATAAT       | host  | 0.830  |
| 5.    | +      | (16427..16458) | TTGCTTAACCAAATATAATAGGGTACTATTAT     | host  | 0.828  |
| 6.    | -      | (21440..21471) | TTGACTATGTGACAGATGGTAAAGTGTATGAT     | host  | 0.925  |
| 7.    | +      | (21925..21932) | ACTAAATA                             | host  | 0.921  |
| 8.    | -      | (21932..21957) | TTGACTAGTAACATTAACCCTATTAT           | host  | 0.989  |
| 9.    | -      | (22052..22077) | TTGACACATAGGAGTATTCCTAAGAT           | host  | 0.977  |
| 10.   | -      | (25353..25381) | TAAAATGCACTTGTGTAACCCAATATAAT        | host  | 0.914  |
| 11.   | -      | (25844..25872) | TTGACATTTTCATTTTTTTTCGTGTAAGTT       | host  | 0.836  |
| 12.   | +      | (25888..25916) | TTGATTTCCATTATGCCGTGTGTATACT         | host  | 0.922  |
| 13.   | +      | (26188..26219) | TTGACTTGCGCCGGACTTATTTTCAGTACTAT     | host  | 0.906  |
| 14.   | -      | (26385..26411) | TTGACATGTGCTTTTCCTTTGTAGTGT          | host  | 0.829  |
| 15.   | +      | (28901..28908) | CATAAATA                             | host  | 0.804  |
| 16.   | +      | (30964..30989) | TTGACAAGTTAATAGTACTCTATTAT           | host  | 0.997  |
| 17.   | +      | (34780..34805) | TTGATAAATTAATAGAACACTATTAT           | host  | 0.984  |
| 18.   | -      | (34805..34812) | ACTAAATA                             | host  | 0.961  |
| 19.   | +      | (35794..35822) | GTATACAGTAAACGAAAGCCATATATTAT        | host  | 0.853  |
| 20.   | -      | (37962..37997) | TCATTATTCATCTCTTACCTCGTCTCTTCATATAAT | host  | 0.802  |
| 21.   | +      | (38264..38295) | TTTACTTACCGCTGCTGTGGTTCTGTTATCAT     | host  | 0.826  |
| 22.   | -      | (38892..38919) | TTGCCACGAAACAGTATTCCTAATAT           | host  | 0.818  |

Table S5: Total Rho-independent terminators In SGPC predicted by Arnold

| 5' end position | Predicting program | Strand | Sequence                                                    | Free energy of stem loop region (Kcal/mol) |
|-----------------|--------------------|--------|-------------------------------------------------------------|--------------------------------------------|
| 212             | <u>Rnamotif</u>    | +      | <u>GATGTCGTAAC TGCCTCCGTACGGGCGCGccTTGTTGTTACGG</u>         | 10.60                                      |
| 1045            | <u>Rnamotif</u>    | +      | <u>CCGTTTCTGCGGTGAATACGCCTTTTCTTGCGT</u>                    | 4.10                                       |
| 3086            | <u>Rnamotif</u>    | +      | <u>CGGTGTCACGGGCGGCATTATATGCCGCTATCTGTTCCCT</u>             | 10.80                                      |
| 4099            | <u>Rnamotif</u>    | +      | <u>AATTTTGACAAGCCGTGCGCCAGCGGCTTTTGACGTCGC</u>              | 7.10                                       |
| 4107            | Both               | +      | <u>CAAGCCGTCGCCAGCGGCTTTTGACGTCGCTGagTTAGTTTTATCC</u>       | 10.90                                      |
| 4475            | Both               | -      | <u>AAAAC TGCTAAGGCGGAAGACAAGCATCCGCCTTTTATTTTCCA</u>        | 9.70                                       |
| 4498            | <u>Rnamotif</u>    | +      | <u>GTCTCCGCCTTAGCAGTTTTAGTGGCTGCTATTTTCCCATCG</u>           | 9.50                                       |
| 4539            | <u>Rnamotif</u>    | +      | <u>TCGCGATAAAGGCGCCTCATGCCGCGGCTATGTTGTCGAA</u>             | 12.70                                      |
| 4552            | <u>Rnamotif</u>    | +      | <u>CGCCTCATGCCCGCGGCTAGTTGTCGaaTTTTTGTTTAGC</u>             | 6.90                                       |
| 5091            | <u>Rnamotif</u>    | +      | <u>AGTTGCGTCAGGCGGGAACCACCGCTTTTCCGGTGCG</u>                | 8.80                                       |
| 6982            | <u>Rnamotif</u>    | -      | <u>CCTAAGAAAAAGGCCCTTTCCGGGCTTAGTTCATTCC</u>                | 13.40                                      |
| 6983            | Both               | +      | <u>AATGAACTAAGGCCCGAAAGGGCCTTTTCTTAGGC</u>                  | 14.30                                      |
| 8135            | <u>Rnamotif</u>    | -      | <u>ACCATATAAGGGCGCGATGACCGCGCagTTTTACGTTCTT</u>             | 8.80                                       |
| 11361           | <u>Rnamotif</u>    | -      | <u>GGTATACTCTTGAGGACTTCGTTCCCTCTTTTCAATTTATA</u>            | 13.20                                      |
| 12431           | Both               | +      | <u>GATATCGCCAATAGTGGTAATTGCCATTATTTATTTCTCA</u>             | 6.00                                       |
| 14027           | Both               | -      | <u>AAGTAACGAAAGGCCCTTCAAGGGCCTTAATTTTGCCC</u>               | 13.80                                      |
| 14028           | Both               | +      | <u>GGCAAAATTAAGGCCCTTGAAGGGCCTTTCGTTACTTA</u>               | 13.80                                      |
| 16851           | Both               | -      | <u>GTAAACATAAAGGCCCCATAACGGGGCCcTTATGTTCTCGTT</u>           | 13.40                                      |
| 16853           | Both               | +      | <u>CGAGACATAAAGGCCCGTTATGGGCCTTTATGTTTACT</u>               | 13.10                                      |
| 17617           | <u>Rnamotif</u>    | -      | <u>GGGAATCATTACGGGGGTAATCCCGTTTACTTTTATC</u>                | 6.90                                       |
| 20227           | Both               | -      | <u>CCTACCACCAAGCCCGCTTCTGIGGGCTTTTCTGTACAC</u>              | 11.40                                      |
| 21974           | Both               | -      | <u>TAGTCCCTTATCCCGGTAAC T GACCTACCGGGATTTTTTTTATCTG</u>     | 13.30                                      |
| 23116           | Both               | -      | <u>AAATGTTAATCTCCGAAGGGTAAACCAACTTTCCGGAgaTTTTTATIGTG</u>   | 10.70                                      |
| 23117           | Both               | +      | <u>ACAATAAAAAATCTCCGAAAGTTGGTTACCCTTCCGAGATTAACATTTATGC</u> | 9.70                                       |
| 24275           | <u>Rnamotif</u>    | +      | <u>CCCTTTCGGCAGCGGGCCCGCGcTTTTTCGATGCG</u>                  | 7.10                                       |
| 25571           | Both               | -      | <u>TACGATTAGTGGGCAGGTTTTAGACCTGCCCTTAGTTACCAG</u>           | 15.40                                      |
| 26343           | Both               | -      | <u>TAGTGTTAAGGCCCTGACGTTCCGCGGTTGGGGCTTTTCTTTTATTC</u>      | 12.30                                      |
| 28587           | Both               | -      | <u>TIGGGATACAGGGCCTGATGGCCCTTTCTTTTACT</u>                  | 14.10                                      |
| 31683           | <u>Rnamotif</u>    | +      | <u>AATTTAACTAAGGCCCTTCATTGGGCCTTTTACTAAGG</u>               | 11.00                                      |
| 35199           | <u>Rnamotif</u>    | -      | <u>CGTAGACGAAAGCCCATGCCAGATGGTGGGCTTTTATTCTTAC</u>          | 10.10                                      |
| 35299           | <u>Rnamotif</u>    | -      | <u>CTGAATCTGCTGGCTCCTTGTTGCGGGCCTTATATTATTTA</u>            | 7.10                                       |
| 35936           | Both               | +      | <u>TATCTTAAGGGTTGGCGGTACCTGTCGATTTTCCAAGGAA</u>             | 6.20                                       |
| 38291           | Both               | -      | <u>TAAATAGTAAAGGCCCGTAAGGGCCTTAATTTATGAT</u>                | 14.30                                      |
| 38292           | Both               | +      | <u>TCATAAATTAAGGCCCTTACGGGGCCTTACTATTTAT</u>                | 13.40                                      |
| 39521           | <u>Rnamotif</u>    | +      | <u>CCGAATTTCCAGGGTAGAAGATATGCTTTGCCCTTTAGCTTCCGG</u>        | 8.00                                       |
| 40164           | <u>Rnamotif</u>    | -      | <u>CAGTCTACGTGATGCTGGTTTTCTCCCGGCATTTTTAACTTTAC</u>         | 12.00                                      |

| Protein Superfamily | Index in Query Genome | Sequence Header |
|---------------------|-----------------------|-----------------|
| MCP                 | 44                    | ORF 20          |
| Portal              | 37                    | ORF27           |
| TermL               | 36                    | ORF 28          |
| MTP                 | 53                    | ORF11           |
| Sheath              | NOT FOUND             |                 |
| Ad1                 | 48                    | ORF 16          |
| Hc1                 | 50                    | ORF 14          |
| Ne1                 | 51                    | ORF 13          |
| Tc1                 | 52                    | ORF P12         |

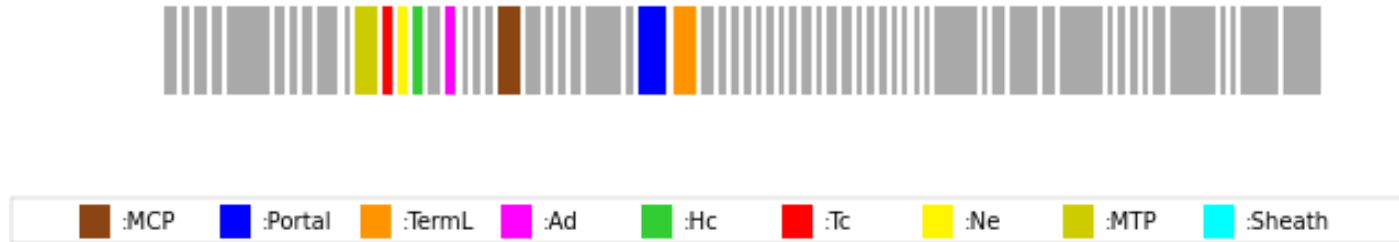

Figure S2: Neck Module and part of the Head and Tail Proteins arrangement suggesting SGPC belongs to Siphoviridae of Type1 (Cluster 5) , here MCP shows major capsid protein, Portal proteins, TermL refers to Terminal proteins, Ad for adapters, Hc for head closure, Tc for Tail completion ,Ne for neck protein and MTP refers to major tail protein
